# Supplementary material for: Rapamycin transiently induces mitochondrial remodeling to reprogram energy metabolism in old hearts
Source: PubMed Central journal article supplement (PMC4789585; doi:10.18632/aging.100881), 2016-02-11
Supplement: aging-08-314-s001.pdf [file aging-08-314-s001.pdf]

## SUPPLEMENTAL FIGURE

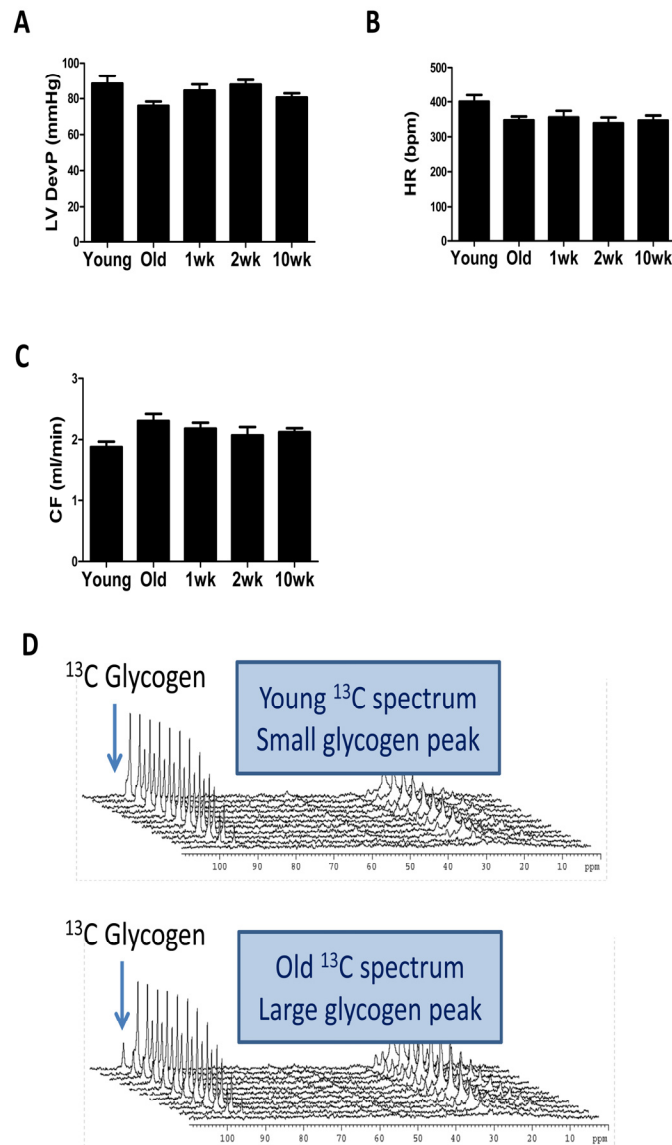

**Figure S1. Incorporation of  $^{13}\text{C}$  glucose into glycogen increases in old hearts.** In isolated perfused heart, LV developed pressure (A), heart rate (B) and coronary flow (C) were not significantly different with aging or rapamycin treatment. (D) Dynamic  $^{13}\text{C}$  NMR spectroscopy of isolated perfusion hearts showed a larger  $^{13}\text{C}$  glycogen peak, indicating an increase in the incorporation of  $^{13}\text{C}$  glucose into glycogen, in old hearts compared to young controls.
